# Supplementary material for: An Eco-Friendly Manner to Prepare Superwetting Melamine Sponges with Switchable Wettability for the Separation of Oil/Water Mixtures and Emulsions
Source: MDPI journal article supplement (doi:10.3390/polym16050693), 2024-03-03
Supplement: s1 [file s1]

## **Supporting Information**

# **An Eco-Friendly Manner to Prepare Superwetting Melamine Sponges with Switchable Wettability for The Separation of Oil/water Mixtures and Emulsions**

Guyita Berako Belachew<sup>1</sup>, Chien-Chieh Hu<sup>1</sup>, Yan-Yu Chang<sup>2</sup>, Chih-Feng Wang<sup>3\*</sup>,

Wei-Song Hung<sup>1</sup>, Jem-Kun Chen<sup>4</sup>, Juin-Yih Lai<sup>1, 5, 6</sup>

1 Graduate Institute of Applied Science and Technology, Advanced Membrane Materials Research Center, National Taiwan University of Science and Technology, Taipei, 106, Taiwan

2 Department of Materials Science and Engineering, I-Shou University, Kaohsiung, 840, Taiwan.

3 Institute of Advanced Semiconductor Packaging and Testing, National Sun Yat-sen University, Kaohsiung, 804, Taiwan

4 Department of Materials Science and Engineering, National Taiwan University of Science and Technology, Taipei, 106, Taiwan

5 R&D Center for Membrane Technology, Chung Yuan Christian University, Taoyuan, 320, Taiwan

6 Department of Chemical Engineering and Materials Science, Yuan Ze University, Taoyuan, 320, Taiwan

\*To whom all correspondence should be addressed

E-mail: cfwang@mail.nsysu.edu.tw

Tel: 886-7-5252000-6610

## **Materials**

Commercial melamine sponge was purchased from BASF. HCl (37%) and Chloroform (99%) were purchased from Fluka. Sodium Laurate (>97%) was purchased from Tokyo Chemical Industry Co., Ltd.. Petroleum ether (60/80) and n-hexadecane (99%) were purchased from Alfa Aesar. Span 80, tween 80, and n-octane (98%) were purchased from Acros Organics. Isooctane (99.7%), and n-hexane (95%) were purchased from TEDIA Company Inc.

## **Instruments and characterization**

The surface morphology was evaluated by Scanning electron microscopy (SEM; JEOLJSM-6500, JEOL. Ltd.). Attenuated total reflection Fourier transform infrared spectra (ATR-FTIR, PerkinElmer, Inc.) was used to record the surface composition of the pristine and superwetting MS. The static contact angle on the pristine and superwetting MS was evaluated through a Magic Droplet-100 contact angle goniometer (Sindatek Instruments Co., Ltd.) by injecting a 5  $\mu$ L liquid droplet. To analyze water content in the permeate, a titrator Compact C10SX Coulometric Karl Fischer moisture titrator (Mettler-Toledo PacRim AG) was used. A total organic carbon analyzer (Vario TOC, Elementar) was used to measure the oil content in the filtrate. Optical microscopy images were characterized by a VHX-7000 instrument (Keyence Corp.).

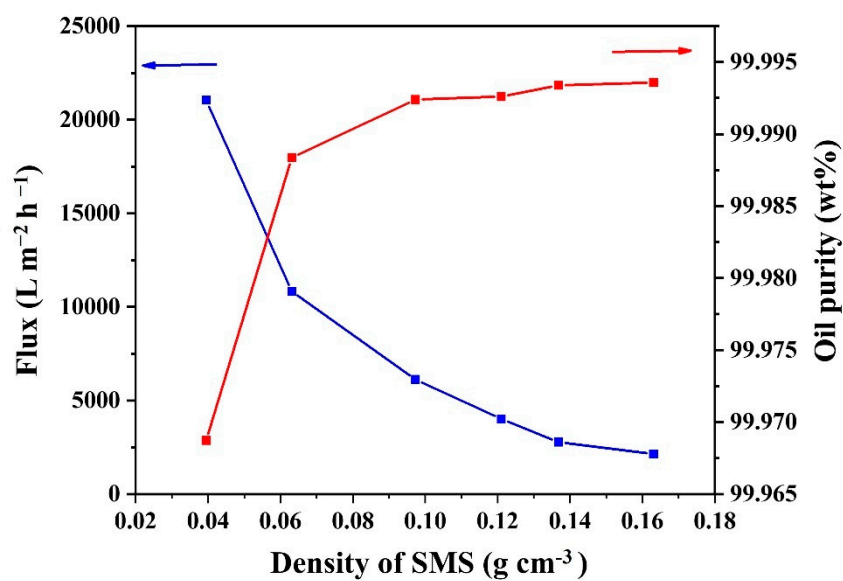

Figure S1. The changes of filtrate flux and separation performance for water-in-isooctane emulsion with increasing the density of the compressed SMS layer.

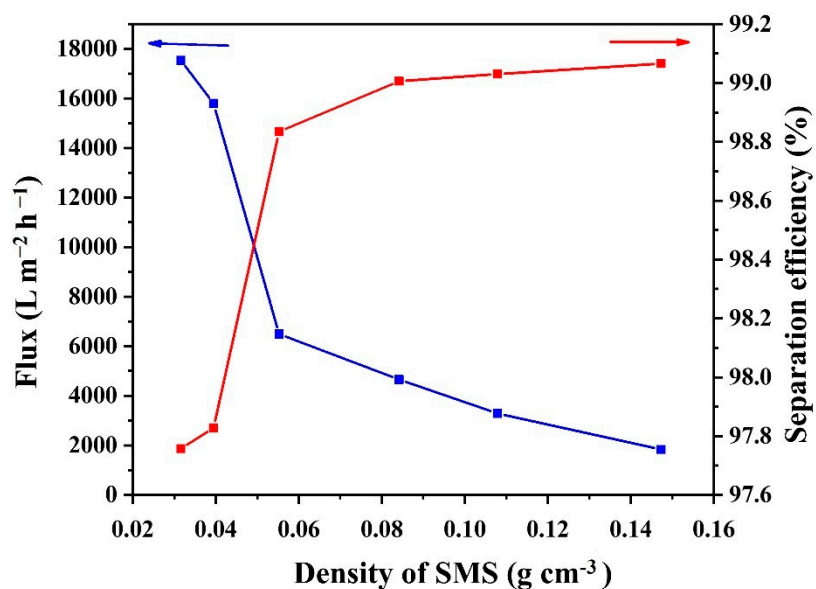

Figure S2. The changes of filtrate flux and separation efficiency for isooctane-in-water emulsion with increasing the density of the compressed SMS.

Table S1. Comparison of various superwetting materials for surfactant stabilized water-in-oil emulsion separations.

| Materials                                     | Water-in-oil emulsion separation         |                  | Reference |
|-----------------------------------------------|------------------------------------------|------------------|-----------|
|                                               | Flux ( $\text{L m}^{-2} \text{h}^{-1}$ ) | Oil purity (wt%) |           |
| FPBZ/SiO <sub>2</sub> @Melamin sponge         | 1500                                     | >97.6            | [S1]      |
| PVPh/PBO coated raw cotton                    | 10,400                                   | >99.98           | [S2]      |
| PBZ-SiO <sub>2</sub> -MS                      | 1300                                     | >99.9            | [S3]      |
| 3D Composite PXS NF                           | 6200                                     | >99.96           | [S4]      |
| Dually prewetted carbon black membrane (DCBM) | 8500                                     | >99.6            | [S5]      |
| Superhydrophobic copper foam                  | 6560                                     | >99.89           | [S6]      |
| Superwetting melamine sponge (SMS)            | 7210                                     | >99.98           | This work |

Table S2. Comparison of various superwetting materials for surfactant stabilized oil-in-water emulsion separations.

| Materials                                                          | Oil-in-water emulsion separation         |                | Reference |
|--------------------------------------------------------------------|------------------------------------------|----------------|-----------|
|                                                                    | Flux ( $\text{L m}^{-2} \text{h}^{-1}$ ) | Efficiency (%) |           |
| GO/g-C <sub>3</sub> N <sub>4</sub> /TiO <sub>2</sub> Melamine foam | 1910.8                                   | >99            | [S7]      |
| Superhydrophilic Ti foam                                           | 1033                                     | >98            | [S8]      |
| Biomimetic hydrophilic membrane (MF-D/T-2/8)                       | 2100                                     | >99.6          | [S9]      |
| WBG (waste bricks) layer                                           | 1079                                     | >98.4          | [S10]     |
| Silica-decorated microfiltration membranes                         | 1431                                     | >99            | [S11]     |
| Waste-coal fly ash (CFA)                                           | 1050                                     | >92            | [S12]     |
| Superwetting melamine sponge (SMS)                                 | 5054                                     | >98.84         | This work |

## References

- [S1] Ge J., Wang F., Yin X., Yu J., Ding B. Polybenzoxazine-functionalized melamine sponges with enhanced selective capillarity for efficient oil spill cleanup, *ACS Appl. Mater. Interfaces* 10(46) (2018) 40274-40285.
- [S2] Ejeta D.D., Wang C.-F., Kuo S.-W., Chen J.-K., Tsai H.-C., Hung W.-S., Hu C.-C., Lai J.-Y. Preparation of superhydrophobic and superoleophilic cotton-based material for extremely high flux water-in-oil emulsion separation, *Chem. Eng. J.* 402 (2020) 126289.
- [S3] Peng Y., Liu Y., Dai J., Cao L., Liu X. A sustainable strategy for remediation of oily sewage: Clean and safe, *Sep. Purif. Technol.* 240 (2020) 116592.
- [S4] Chu Z., Seeger S., Multifunctional hybrid porous micro-/nanocomposite materials, *Adv. Mater* 27(47) (2015) 7775-7781.
- [S5] Cao G., Wang Y., Wang C., Ho S.-H. A dually prewetted membrane for continuous filtration of water-in-light oil, oil-in-water, and water-in-heavy oil multiphase emulsion mixtures, *J. Mater. Chem. A* 7(18) (2019) 11305-11313.
- [S6] Wang Z., Xiao C., Wu Z., Wang Y., Du X., Kong W., Pan D., Guan G., Hao X. A novel 3D porous modified material with cage-like structure: fabrication and its demulsification effect for efficient oil/water separation, *J. Mater. Chem. A* 5(12) (2017) 5895-5904.
- [S7] Zhan B., Liu Y., Zhou W.-T., Li S.-Y., Chen Z.-B., Stegmaier T., Aliabadi M., Han Z.-W., Ren L.-Q. Multifunctional 3D GO/g-C<sub>3</sub>N<sub>4</sub>/TiO<sub>2</sub> foam for oil-water separation and dye adsorption, *Appl. Surf. Sci.* 541 (2021) 148638.
- [S8] Zhang L., Yang X., Jiang B., Sun Y., Gong Z., Zhang N., Hou S., Li J., Yang N. Superhydrophilic and underwater superoleophobic Ti foam with robust nanoarray structures of TiO<sub>2</sub> for effective oil-in-water emulsion separation, *Sep. Purif. Technol.* 252 (2020) 117437.
- [S9] Yang X., Yan L., Wu Y., Liu Y., Shao L. Biomimetic hydrophilization engineering on membrane surface for highly-efficient water purification, *J. Membr. Sci.* 589 (2019) 117223.
- [S10] Li Z., Wu J., Yue X., Qiu F., Yang D., Zhang T., Study on the application of waste bricks in emulsified oil-water separation, *J. Clean. Prod.* 251 (2020) 119609.
- [S11] Yang H.-C., Pi J.-K., Liao K.-J., Huang H., Wu Q.-Y., Huang X.-J., Xu Z.-K. Silica-decorated polypropylene microfiltration membranes with a mussel-inspired intermediate layer for oil-in-water emulsion separation, *ACS Appl. Mater. Interfaces* 6(15) (2014) 12566-12572.
- [S12] Li Z., Qian W., Chen Y., Xu P., Li J., Yang J. A new treasure in industrial solid waste—Coal fly ash for effective oil/water separation, *J Taiwan Inst Chem Eng* 118 (2021) 196-203.
